# Supplementary material for: A Hemin–Graphene Nanocomposite-Based Aptasensor for Ultrasensitive Colorimetric Quantification of Leukaemia Cells Using Magnetic Enrichment
Source: MDPI journal article supplement (doi:10.3390/bios12121070), 2022-11-23
Supplement: s1 [file s1]

Supporting information

# A Hemin–Graphene Nanocomposite-Based Aptasensor for Ultrasensitive Colorimetric Quantification of Leukaemia Cells Using Magnetic Enrichment

Jing Su <sup>1</sup>, Liqiang Zhang <sup>1</sup>, Luogen Lai <sup>2</sup>, Wufu Zhu <sup>2,\*</sup> and Chong Hu <sup>1,\*</sup>

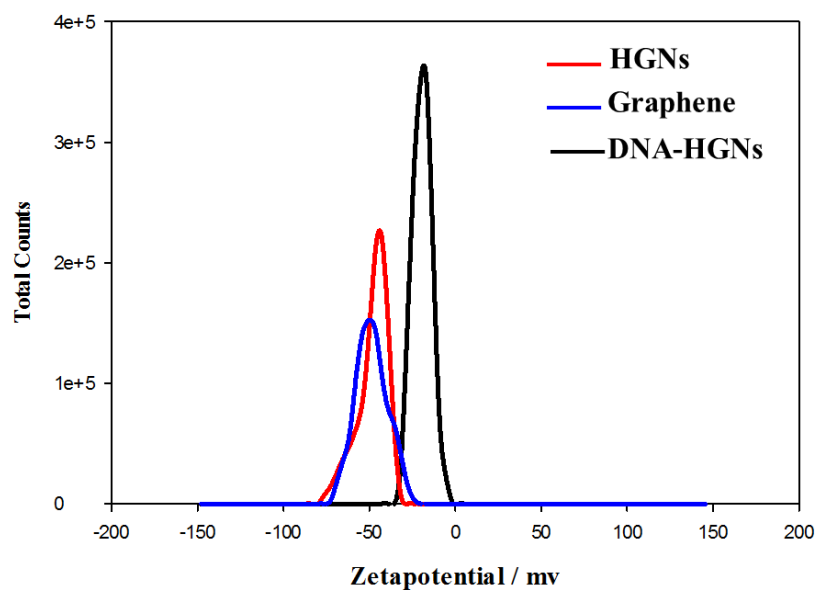

Figure S1. Zeta potential of HGNs, Graphene and DNA-HGNs.

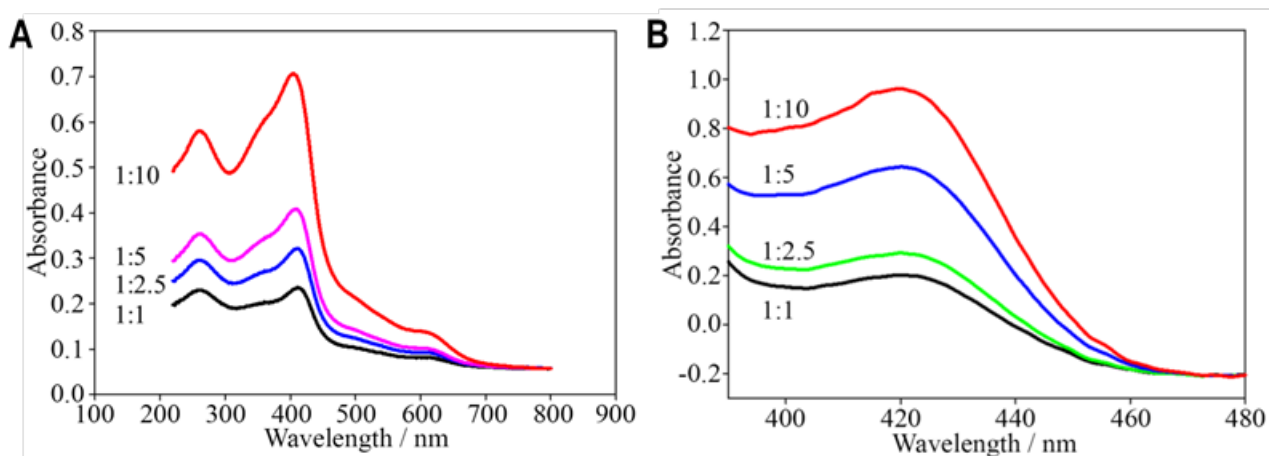

**Figure S2.** UV spectroscopy characterization and activity test of HGNs prepared with various weight ratios of GO to hemin. Graphene oxide/hemin ratios from 1:1 to 1:10 were tested in the preparation of HGNs, and the products were analyzed by UV spectroscopy (A) and for their peroxidase activities using ABTS as a substrate (B).

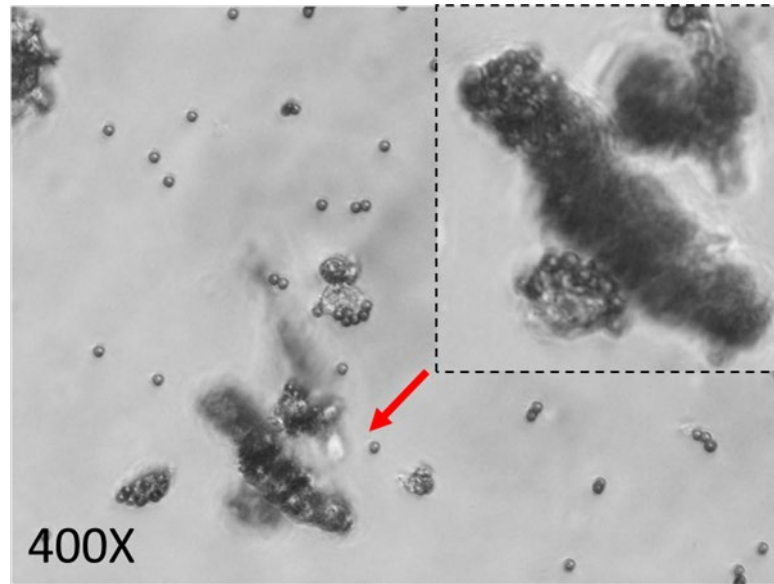

**Figure S3.** Microscope image of capture probes modified magnetic beads for capturing CEM cells.

$$\text{modified ratio} = \frac{A_0 - A_1}{A_n} \times 100\%$$

$A_0$  was the UV absorption at 260 nm before modification,  
 $A_1$  was the UV absorption at 260 nm after modification.
